## Developmental changes in cardiorespiratory patterns associated with terrestrial apnoeas in harbour seal pups

Jennifer L. Lapierre<sup>1,\*</sup>, Jason F. Schreer<sup>2,†</sup>, Jennifer M. Burns<sup>3</sup> and Michael O. Hammill<sup>4</sup>

<sup>1</sup>Department of Biology, University of Waterloo, Waterloo, ON, Canada N2L 3K8, <sup>2</sup>Department of Biology, SUNY Potsdam, Potsdam, NY 13676, USA, <sup>3</sup>Department of Biological Sciences, University of Alaska Anchorage, Anchorage, AK 99508, USA and <sup>4</sup>Maurice Lamontagne Institute, Department of Fisheries and Oceans, Mont-Joli, QC, Canada G5H 3Z4

\*Present address: Center for Sleep Research, UCLA/VA-GLAHS, Neurobiology Research 151-A3, 16111 Plummer Street, North Hills, CA 91343, USA

†Author for correspondence (e-mail: schreejf@potdam.edu)

Accepted 29 July 2004

### Summary

During the nursing period seals undergo several physiological and behavioural changes. A key component of development is increased cardiorespiratory control, fundamental for breath-holding and thus diving. This study focused on the ontogenetic changes in cardiac responses to respiration in quietly resting, pre-weaned harbour seal pups (*Phoca vitulina*). During periods of quiet rest, breathing became episodic, eupnoea interspersed with periods of apnoea. Little change was observed in respiration ( $\sim 35$  breaths  $\text{min}^{-1}$ ) and eupnoeic heart rate ( $\sim 160$  beats  $\text{min}^{-1}$ ) throughout the nursing period. However, apnoea duration increased (from  $\sim 20$  to  $40$  s), while apnoeic heart rate decreased with age (from  $\sim 150$  to  $90$  beats  $\text{min}^{-1}$ ). The observed decline in apnoeic heart rate resulted from an increase in cardiorespiratory

control as pups approached weaning, evident by the ability to maintain a lower heart rate more consistently. Similar changes in cardiorespiratory patterns have been reported for elephant and Weddell seals. Due to the early onset of independent foraging, however, the rate of cardiorespiratory control development was more rapid in harbour seals. Our findings suggest that by 1 month of age, harbour seal pups possess the cardiorespiratory control necessary to sustain long-duration apnoeas, fundamental for proficient diving and successful foraging upon weaning.

Key words: apnoea, eupnoea, respiration, heart rate, bradycardia, sleep, ontogeny, cardiorespiratory control, harbour seal, *Phoca vitulina*.

### Introduction

The obligation to surface periodically and replenish oxygen stores limits the underwater foraging capacity of marine mammals. To compensate for this need, most marine mammals possess a suite of physiological adaptations which, together, maximize foraging time while minimizing surface intervals (Butler and Jones, 1997). The ability to perform long apnoeas, however, not only facilitates underwater foraging, but also aids in conserving water and energy during terrestrial fasts (Ortiz et al., 1978; Costa and Ortiz, 1980; Huntley, 1984; Blackwell, 1996). Seals at rest, whether hauled-out or submerged, exhibit long-duration, sleep-associated apnoeas (Bartholomew, 1954; Ridgway et al., 1975; Castellini et al., 1994a), which elicit physiological responses similar to those observed while diving (Castellini, 1991, 1994; Andrews et al., 1997).

The physiological factors that limit both diving and sleep apnoea duration are correlated with animal size and age. In adults, total body oxygen stores are proportional to body mass ( $M_b$ ; Kooyman, 1989), whereas metabolic rate scales to  $M_b^{0.75}$  (Kleiber, 1961). Thus, apnoea durations are shorter for smaller

species. In addition, pups and juveniles have reduced breath-holding capacities because young, growing animals have higher mass-specific metabolic rates and lower mass-specific total body oxygen stores, compared to adults of similar size (Brody, 1945; Kleiber, 1961; Poczopko, 1979; Lavigne et al., 1986). Furthermore, the ability to regulate physiological processes such as heart rate, respiration, body temperature and vasoconstriction is not fully developed at birth (Cherepanova et al., 1993; Castellini et al., 1994b; Thorson and Le Boeuf, 1994; Burns et al., 1996; Hansen and Lavigne, 1997; Falabella et al., 1999).

The rate of physiological development appears to be closely linked to the onset of independent foraging (Castellini et al., 1994b; Burns et al., 1996; Castellini, 1996; Burns, 1997; Falabella et al., 1999; Noren et al., 2001). To survive this transition, seal pups must develop adequate swimming and diving skills before their energy reserves are depleted. A key component of neonatal development is increased cardiorespiratory control (Castellini, 1996). Prior to their first

foraging trip, weaned elephant seals (*Mirounga angustirostris* and *M. leonina*) spend several months on land, which represents a critical period for the maturation of cardiorespiratory control mechanisms (Castellini et al., 1994b; Castellini, 1996; Falabella et al., 1999). Older seals not only exhibit a stable breathing pattern, consisting of extended apnoeas followed by short periods of eupnoea, they also display a lower and less variable heart rate during apnoea, and a well-developed sinus arrhythmia during eupnoea (Castellini et al., 1994b; Castellini, 1996; Falabella et al., 1999).

Harbour seals *Phoca vitulina*, unlike most other phocid neonates, enter the water within hours of birth (Newby, 1973) and are increasingly aquatically active throughout the nursing period (Bekkby and Bjørge, 2000; Jørgensen et al., 2001). Therefore, the acquisition of swimming and diving skills is temporally separated from the onset of independent foraging. As such, the degree of cardiorespiratory control may be greater at birth, and/or the rate of maturation more rapid in this precocial species, compared to phocid species that delay aquatic activity until after weaning (Castellini, 1995, 1996; Burns, 1997). Thus, the aim of this study was to describe the ontogenetic changes in cardiorespiratory patterns associated with terrestrial apnoeas in harbour seal pups from birth to weaning.

### Materials and methods

This study was conducted near Bic (48°24'N, 68°51'W) and Métis (48°41'N, 68°01'W), QC, Canada, on the south shore of the St Lawrence River Estuary, from May to July of 2001 and 2002. Harbour seals *Phoca vitulina* L. were captured in the water using a dip net and an inflatable boat, and subsequently transferred to a larger boat where all handling took place. Prior to analysis, seals were weighed (to  $\pm 0.5$  kg), tagged, and their sex noted (Dubé et al., 2003). Additionally, as part of a concurrent study, blood samples were collected from each animal prior to release (Clark, 2004). Animals were recaptured opportunistically throughout the nursing period and re-monitored when the interval between consecutive recordings exceeded 5 days. When possible, weaned pups and adult females (mothers of pre-weaned pups) were also captured and monitored in a similar manner to younger pups.

### Data collection

Due to the precocial nature of this species, and the logistic constraints imposed by working on small boats, measurements could not be obtained from unrestrained animals. As a result, during the 2001 field season, pups were manually restrained during measurements: with a pup positioned in ventral recumbency, a single handler, facing in the opposite direction, knelt and straddled the pup at midbody, pinioned the foreflippers to the side of the animal, and then leaned forward and applied pressure to the hindflippers. In 2002, pups were physically restrained using a custom built adjustable wooden V-board and canvas harness. Adult females were covered with a net and manually restrained by a single handler.

Electrocardiogram (ECG), heart rate and respiration data were collected using a portable multi-channel physiological recorder (BioTach with Serial Linked Interface Component Software, Model 2121/3R-SP, UFI, Morro Bay, CA, USA) connected to custom designed electrodes (25 G  $\times$  1.5 inch hypodermic needles soldered to 8 m lengths of 4-conductor 20 G microphone cable; PrecisionGlide® #305127, Becton-Dickinson, Franklin Lakes, NJ, USA; #8424, Belden Inc., Richmond, IN, USA) and a portable computer. Electrodes were inserted subdermally in the mid-dorsal region of the animal and then anchored to the fur using cyanoacrylate adhesive and accelerator (Superbonder® 422 Instant Adhesive and Tak Pak® 7452 Accelerator, Loctite Canada Inc., Mississauga, ON, Canada). The negative electrode was placed over the left scapula, the positive electrode at a diagonal equidistant from the heart on the opposite side, and the ground to the left of the positive electrode. The BioTach monitor converted changes in thoracic impedance into a respiratory signal; therefore any movement in addition to that of the ribcage (e.g. the seal, handler, boat, etc.) was also detected, resulting in erroneous values. As a result, a camcorder (Sony Handycam®, CCD-TRV57, and Rain Jacket, LCR-TRX3, Sony Ltd., Toronto, ON, Canada) was also used to record respiration visually and to obtain additional behavioural data.

### Analysis and statistics

Rest was defined as a period of time during which an animal was lying quietly with its eyes closed (Blackwell and Le Boeuf, 1993; Castellini et al., 1994b). However, it should be noted that even though an animal is lying motionless with its eyes closed, it may not be sleeping; such a state has also been exhibited during periods of quiet wakefulness (Mukhametov et al., 1982). Eupnoea was categorized by regular opening and closing of a pup's nostrils, while apnoea was observed as a breath-hold, during which nostrils remained closed for  $>10$  s following an exhalation (Bacon et al., 1985; Blackwell and Le Boeuf, 1993; Falabella et al., 1999). Since electroencephalographic activity was not recorded during this study, respiratory pauses are referred to as terrestrial apnoeas rather than sleep apnoeas (Castellini et al., 1994b).

Video recordings were viewed and the percentage of time spent resting was calculated using the camcorder on-screen clock display. The occurrence of each respiration was determined from the video recordings using an elapsed timing program designed in MatLab 6.1® (The Mathworks Inc., Natick, MA, USA). Subsequently, the time interval between consecutive breaths was converted to an instantaneous breathing rate (breaths  $\text{min}^{-1}$ ). The precise onset and cessation of each apnoea was verified by the respiration trace obtained by the physiological monitor. For instances where no corresponding video recording was obtained, apnoeas were selected using a combination of information from field notes, event markers, and the respiration trace. The time interval between successive heartbeats was measured using an R-wave peak detection program designed in Mathcad 2001 Professional® (MathSoft Engineering & Education Inc.

Cambridge, MA, USA). Subsequently, each R-R interval was converted to an instantaneous heart rate (beats  $\text{min}^{-1}$ ).

Pups weighing  $\leq 11.1$  kg at first capture were considered newborn (pup age = 1 day; Dubé et al., 2003). For pups not captured on the day of birth, age (days) was calculated by subtracting the published mass at birth ( $11.1 \pm 0.22$  kg) from the mass at first capture (in kg) and dividing by the observed growth rate ( $\text{kg day}^{-1}$ ) (Dubé et al., 2003). The lactation period for this population of harbour seal pups has been estimated to last  $34 \pm 1.8$  days (Dubé et al., 2003). Pups approaching this age were considered weaned if they were observed to be alone and their blood plasma was clear (i.e. non-lipaeamic; Clark, 2004; Bowen et al., 1985).

To achieve statistical independence, and to optimize age distribution, only one data file was selected from individuals monitored multiple times throughout the nursing period. Effects of year and sex were assessed using a two-way analysis of variance (ANOVA); age relationships were examined using least-squares linear regression; and paired *t*-tests were used to compare heart rate during apnoea and eupnoea (Systat 9 for Windows®, SPSS Inc., Chicago, IL, USA; SAS System for Windows 8.02®, SAS Institute Inc., Cary, NC, USA). Significance level was set at 0.05. Data are presented as means  $\pm$  S.E.M.

## Results

Electrocardiogram, heart rate and respiration records (Fig. 1) were analyzed from 45 pre-weaned harbour seal pups weighing 9–32 kg and ranging from 1–33 days of age. Due to inclement weather only 39 corresponding videos were obtained and analyzed. Observation time averaged  $30.4 \pm 1.3$  min.

Pre-weaned pups spent  $57.0 \pm 3.0\%$  of the observation time resting; during this time, breathing became episodic,

consisting of eupnoea interspersed with periods of apnoea. Breathing frequency did not change significantly over the course of the nursing period; on average, pups breathed at a rate of  $35.0 \pm 0.9$  breaths  $\text{min}^{-1}$  (Fig. 2). Eupnoea episodes lasted  $2.5 \pm 0.2$  min. Pups spent  $12.5 \pm 1.7\%$  of the time resting in apnoea. Pups exhibited significantly fewer apnoeas during the 2001 field season compared to 2002 ( $F_{27,18} = 7.704$ ,  $P = 0.008$ ); the mean number of apnoeas was  $2.7 \pm 0.5$  (range 0–9) and  $5.2 \pm 0.8$  (range 0–12), respectively. Mean apnoea duration increased significantly during the nursing period (Fig. 3). However, maximum apnoea duration ( $43.4 \pm 2.8$  s, range 11–78 s) did not increase with age. The longest breath-hold observed occurred in a 19 day-old pup and lasted for 78 s.

Heart rate was significantly lower during apnoea than during eupnoea ( $t_{31} = -16.05$ ,  $P < 0.0001$ ). Mean eupnoeic heart rate was  $159.6 \pm 1.9$  beats  $\text{min}^{-1}$  and did not change significantly during the nursing period (Fig. 4). Mean apnoeic heart rate decreased significantly with age (Fig. 5A). The distribution of apnoeic heart rate was bimodal, with a minimum number of observations around 100 beats  $\text{min}^{-1}$ . Heart rates were categorized as 'low' ( $< 100$  beats  $\text{min}^{-1}$ ) or 'high' ( $> 100$  beats  $\text{min}^{-1}$ ; Fig. 6). High apnoeic heart rate decreased significantly with age, while the low apnoeic heart rate remained stable at  $75.7 \pm 1.0$  beats  $\text{min}^{-1}$  (Fig. 5B). The proportion of time spent in each mode changed throughout the nursing period. The low mode dominated as age increased (Figs 5C, 6, 7). The lowest instantaneous heart rate recorded, 9 beats  $\text{min}^{-1}$ , occurred in a 19 day-old pup during a 78 s apnoea. The highest instantaneous heart rate recorded was 213 beats  $\text{min}^{-1}$  and occurred during eupnoea in three pre-weaned pups ranging in age from 4–28 days. No sex differences were observed for any of the parameters reported above.

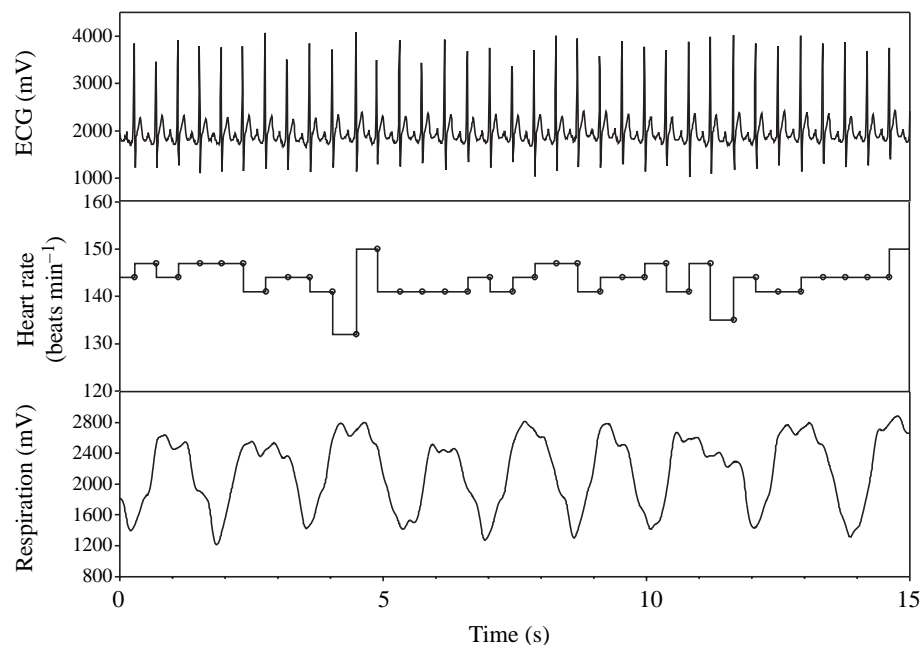

Fig. 1. A 15 s segment of the electrocardiogram, instantaneous heart rate (beats  $\text{min}^{-1}$ ), and respiratory impedance (inspiration upward) trace from a quietly resting 16 day-old male harbour seal pup in eupnoea.

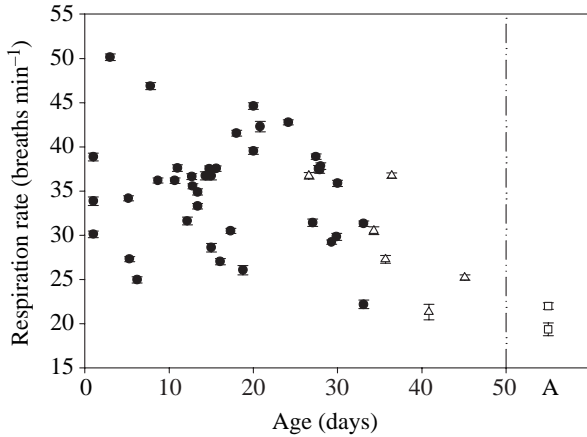

Fig. 2. Respiration rate (mean  $\pm$  S.E.M.) of quietly resting pre-weaned harbour seal pups (circles;  $N=38$ ), weaned pups (triangles;  $N=6$ ) and adult females (A; squares;  $N=2$ ).

**Discussion**

Harbour seal pups demonstrated the ability to regulate heart rate during terrestrial apnoeas from birth. This skill progressed with age, such that by weaning the degree of cardiorespiratory control was similar to that exhibited by older animals. These findings suggest that the rate of maturation of cardiorespiratory control is more rapid in harbour seals than in other previously studied phocid species. By 1 month of age, harbour seal pups possess the cardiorespiratory control necessary to sustain long-duration apnoeas, fundamental for proficient diving and successful foraging upon weaning.

The terrestrial breathing pattern of resting, pre-weaned harbour seal pups was irregular, consisting of apnoeas and eupnoeas of varying durations. Breathing frequency did not change throughout the nursing period and fell within the range observed previously for juvenile harbour seals (18–53 breaths  $\text{min}^{-1}$ ; Harrison and Tomlinson, 1960; Päsche and Krog, 1980; Skinner and Milsom, 2001). Terrestrial

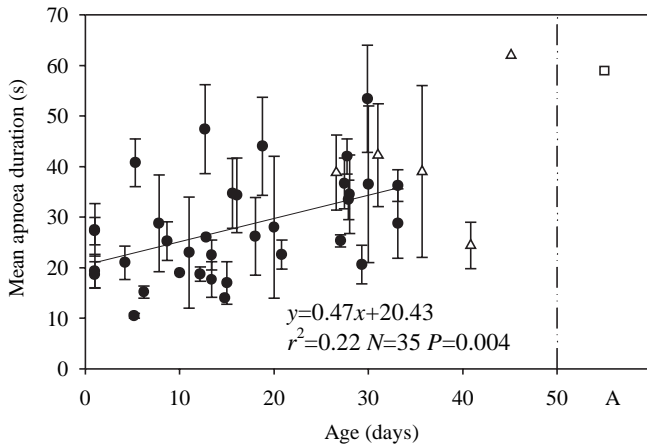

Fig. 3. Terrestrial apnoea duration (mean  $\pm$  S.E.M.) of quietly resting pre-weaned harbour seal pups (circles;  $N=35$ ), weaned pups (triangles;  $N=5$ ) and an adult female (A; square;  $N=1$ ).

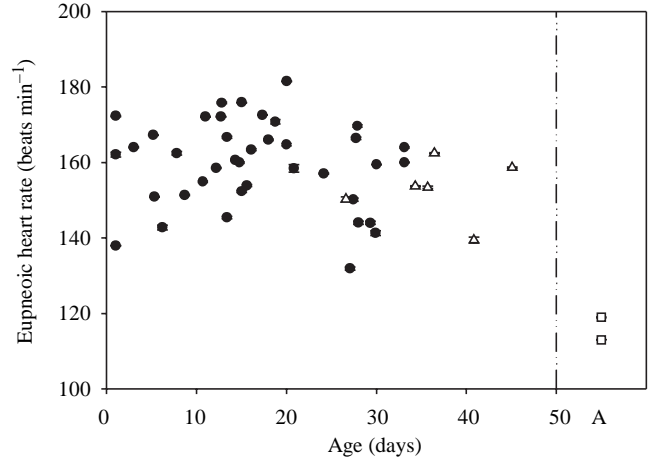

Fig. 4. Eupnoeic heart rate (mean  $\pm$  S.E.M.) of quietly resting pre-weaned harbour seal pups (circles;  $N=39$ ), weaned pups (triangles;  $N=6$ ) and adult females (A; squares;  $N=2$ ).

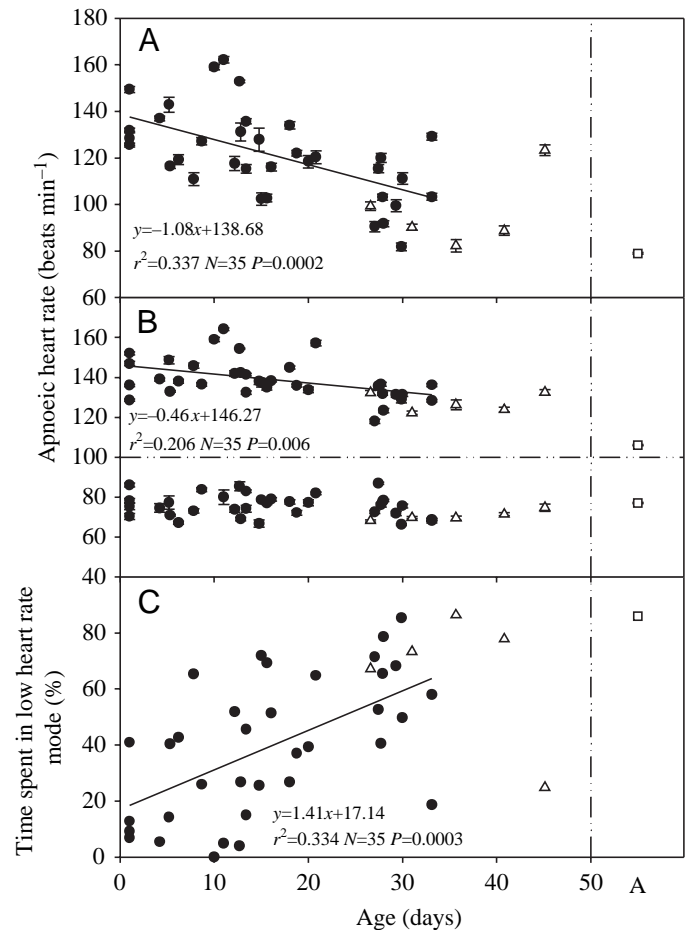

Fig. 5. (A) Apnoeic heart rate (mean  $\pm$  S.E.M.) of quietly resting pre-weaned harbour seal pups (circles), weaned pups (triangles) and an adult female (A; square). (B) Apnoeic heart rate (mean  $\pm$  S.E.M.) separated and categorized as 'high' ( $>100$  beats  $\text{min}^{-1}$ ) or 'low' ( $<100$  beats  $\text{min}^{-1}$ ). (C) Proportion of time spent in the low heart rate mode.

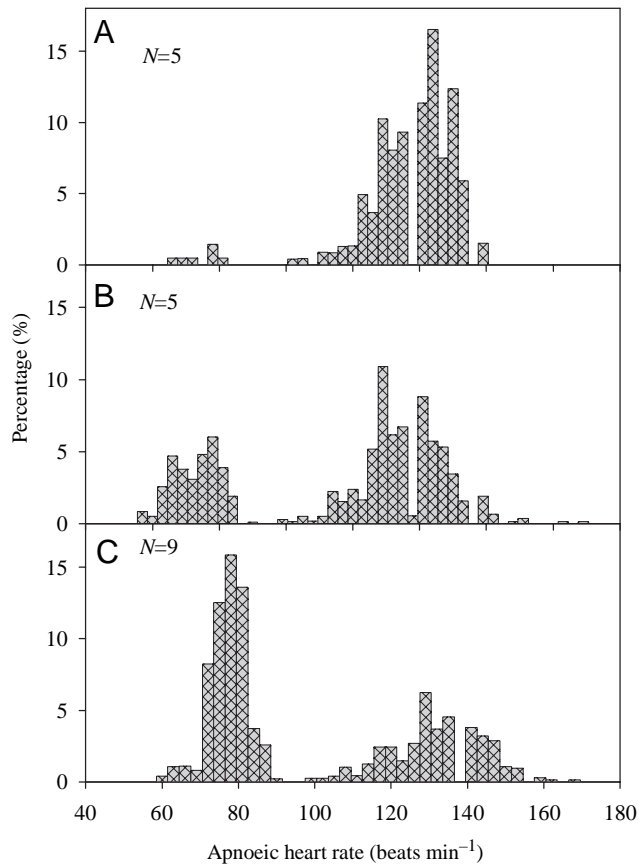

Fig. 6. Frequency histograms illustrating the bimodality of the apnoeic heart rate for a (A) 4 day, (B) 16 day, and (C) 31 day-old quietly resting harbour seal pup.  $N$ =number of apnoeas.

apnoea duration increased during the lactation period, paralleling an increase in dive duration (Greaves et al., in press a), and values were similar to those obtained for resting, captive harbour seal pups less than 2 weeks of age (31 s; Bacon et al., 1985).

Upon weaning, however, several changes occurred. Respiration rate decreased (Fig. 2), approaching adult levels (8–22 breaths  $\text{min}^{-1}$ ; Harrison and Tomlinson, 1960; Bacon et al., 1985). Consistent with dive duration (Greaves et al., in press a), the length of terrestrial apnoeas continued to increase post-weaning (Fig. 3). Terrestrial apnoea durations were similar to those obtained previously for juvenile harbour seals (19–104 s; Irving et al., 1935; Dykes, 1974; Päsche and Krog, 1980; Jobsis et al., 2001), but less than those displayed by adults (225 s; Williams and Bryden, 1993). Additionally, upon weaning, the alternating apnoeic–eupnoeic breathing pattern began to stabilize. For example, a 41 day-old weanling that appeared to be sleeping displayed a regular apnoea–eupnoea cycle until it awoke. Irving et al. (1935) observed a similar breathing pattern in quietly resting 4 month-old harbour seals, describing it as a regularly maintained sequence of 6–12 respirations followed by an apnoea of 30–60 s. The observed changes, from birth to adulthood, can be attributed in part to an increase in total body oxygen stores (Kodama et al., 1977;

Ponganis et al., 1993; Thorson and Le Boeuf, 1994; Burns et al., 1999; Clark, 2004) and a decrease in metabolic rate (Miller and Irving, 1975; Ashwell-Erickson and Elsner, 1981; Rea and Costa, 1992; Hansen, 1995) that occurs with increasing size and age. Additionally, improved cardiovascular control also contributes to the increased breath-holding capacity observed (Castellini et al., 1994b; Castellini, 1996).

In phocids, while diving or sleeping, heart rate follows the pattern of bradycardia during apnoea and tachycardia during eupnoea (Kooyman and Campbell, 1972; Andrews et al., 1997). This bimodal or two-speed heart rate pattern begins to develop *in utero* (Liggins et al., 1980; Bacon et al., 1985). During the last third of gestation, foetal harbour seals exhibited a ‘slower’ heart rate (79  $\text{beats min}^{-1}$ ) that was distinct from the ‘faster’ embryonic rate (125  $\text{beats min}^{-1}$ ) first observed early in gestation (Bacon et al., 1985). The amount of bradycardia steadily increased as parturition approached (Bacon et al., 1985). This bimodal heart rate pattern continues to develop *postpartum* (Table 1).

Eupnoeic heart rate remained stable during the lactation period and was similar to the surface heart rate of free-ranging, diving harbour seal pups (~155  $\text{beats min}^{-1}$ ; Greaves et al., in press a), but greater than the mean rate obtained for resting, captive harbour seal pups (138  $\text{beats min}^{-1}$ ; Bacon et al., 1985). Eupnoeic heart rate presumably begins to decrease post-weaning once animals start to accumulate body mass (~4–6 weeks post-weaning; Muelbert et al., 2003), and then gradually declines (Fig. 4) as animals grow into adulthood (Fig. 4; Stahl, 1967; Castellini and Zenteno-Savin, 1997). Terrestrial apnoeic heart rate decreased throughout the nursing period, paralleling a similar decrease in mean diving heart rate (from ~140 to 70  $\text{beats min}^{-1}$ ; Greaves et al., in press a). However, Bacon et al. (1985) observed a lower mean terrestrial apnoeic heart rate for harbour seal pups less than 2 weeks of age (84  $\text{beats min}^{-1}$ ). Similar to eupnoeic heart rate, further decreases in mean apnoeic heart rate (Fig. 5) would be expected as animals grow into adulthood (Stahl, 1967; Castellini and Zenteno-Savin, 1997).

Similar to Greaves et al. (in press a), our findings suggest that refinement of the regulatory mechanisms, which brought about the foetal bradycardia observed by Bacon et al. (1985), continues after birth. Terrestrial apnoeic heart rate, like diving heart rate (Greaves et al., in press a), was bimodal with a trough around 100  $\text{beats min}^{-1}$ . The high terrestrial apnoeic heart rate observed in this study was comparable to the ‘diving tachycardia’ (~150  $\text{beats min}^{-1}$ ), and the low terrestrial apnoeic heart rate equivalent to the ‘diving bradycardia’ (~70  $\text{beats min}^{-1}$ ), described by Greaves et al. (in press a) for pre-weaned harbour seal pups. In both studies, the decline in mean apnoeic heart rate was driven primarily not by a change in the mean value for each mode but by the proportion of time spent in each mode. Most likely an increase in vagal tone with age (Katona et al., 1980) enabled older animals to spend a greater proportion of time in the lower heart rate mode. In younger pups, the ability to attain a lower heart rate was periodic, whereas in older pups, this lower heart rate was

reached but not strictly maintained, as evident from periodic escapes in vagal control to the higher mode. Greaves et al. (in press b) determined that young pups attempted to reduce their heart rate every 3–10 s during a dive. Consistent with Greaves

et al. (in press a), by the time pups were weaned (~4 weeks of age), they exhibited a degree of cardiovascular control comparable to that of adults (Fig. 5).

As first hypothesized by Castellini (1995), the rate of cardiorespiratory control development was quicker in the harbour seal, compared to elephant and Weddell seals. Although similar changes in cardiorespiratory patterns have been reported for these species (Table 1; Kenny, 1979; Blackwell and Le Boeuf, 1993; Castellini, 1996; Burns et al., 1996), the maturation of cardiorespiratory control mechanisms typically takes longer to develop because of their extended lactation and/or post-weaning fast periods (Castellini et al., 1994a; Burns et al., 1996; Castellini, 1996; Falabella et al., 1999). Unlike harbour seals that enter the water the day they are born (Newby, 1973) and begin foraging before (J.L.L., personal observation) or within days of weaning (Muelbert et al., 2003), northern elephant seals are essentially land bound for 4 months (Thorson and Le Boeuf, 1994). It is during this extended terrestrial fast that cardiorespiratory patterns stabilize (Castellini et al., 1994b; Castellini, 1996; Falabella et al., 1999). Weddell seals begin serious diving around 2 months of age, and as such exhibit a rate of development intermediate to that of harbour and elephant seals

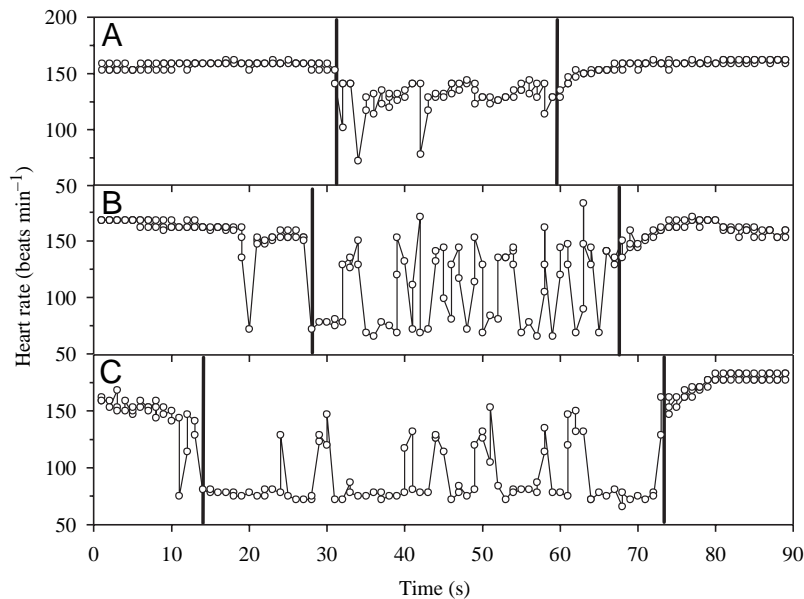

Fig. 7. Instantaneous heart rate trace of a eupnoea–apnoea–eupnoea transition in a (A) 4 day, (B) 16 day, and (C) 31 day-old quietly resting harbour seal pup. Vertical black lines represent the commencement and termination of the apnoea.

Table 1. Changes in eupnoeic and apnoeic heart rate with age in four phocid species

| Species                | Age class <sup>a</sup> | Age              | Mass (kg)            | Heart rate <sup>b</sup> (beats min <sup>-1</sup> ) |                 | Source         |
|------------------------|------------------------|------------------|----------------------|----------------------------------------------------|-----------------|----------------|
|                        |                        |                  |                      | Eupnoeic                                           | Apnoeic         |                |
| Harbour seal           | NP                     | <2 weeks         | 6.5–10.5             | 138                                                | 84              | 1              |
|                        | J                      | 4 months–2 years | 25–33                | 105–145                                            | 53–70           | 2, 3, 4, 5     |
|                        | A                      | 6 years          | 78–114               | 120–125                                            | 60–61           | 1, 6           |
| Weddell seal           | WP                     | 6 weeks          | 106–130              | 94                                                 | 46              | 7              |
|                        | A                      |                  | 360–430 <sup>c</sup> | 55                                                 | 45              | 8              |
| Northern elephant seal | NP <sup>d,e</sup>      | 1→8 weeks        | 40→134               | 130→85                                             | 120→60          | 9, 10, 11, 12  |
|                        | WP                     | 8–16 weeks       | 74–95                | 84–94                                              | 47–54           | 7, 12          |
|                        | J                      | 10–34 months     | 117–198              | 65–73                                              | 45–54           | 11, 12, 13, 14 |
|                        | A                      |                  |                      | 55                                                 | 44              | 15             |
| Southern elephant seal | NP                     | <3 weeks         |                      | 110                                                | 89              | 16             |
|                        | WP                     | 3–11 weeks       |                      | 90                                                 | 61              | 16             |
|                        | A                      |                  |                      | 65 <sup>f</sup>                                    | 45 <sup>f</sup> | 17             |

<sup>1</sup>Bacon et al., 1985; <sup>2</sup>Dykes, 1974; <sup>3</sup>Päsche and Krog, 1980; <sup>4</sup>Jobsis et al., 2001; <sup>5</sup>Skinner and Milsom, 2001; <sup>6</sup>Jones et al., 1973; <sup>7</sup>Zenteno-Savin and Castellini, 1998; <sup>8</sup>Kooyman, 1968; <sup>9</sup>Huntley, 1984; <sup>10</sup>Castellini et al., 1994b; <sup>11</sup>Blackwell, 1996; <sup>12</sup>Kohin et al., 1999; <sup>13</sup>Bartholomew, 1954; <sup>14</sup>Andrews et al., 1997; <sup>15</sup>Castellini et al., 1994a; <sup>16</sup>Falabella et al., 1999; Hindell and Lea, 1998.

<sup>a</sup>NP, nursing pups; WP, weaned pups; J, juveniles; A, adults.

<sup>b</sup>Observed range of values (min–max) from various studies; developmental trends denoted by an arrow (→)

<sup>c</sup>Taken from Kooyman and Campbell (1972).

<sup>d</sup>Note: Bartholomew (1954) did not observe a difference between apnoeic and eupnoeic heart rate (~100 beats min<sup>-1</sup>) in newborn pups.

<sup>e</sup>Also contains weaned, fasting pups.

<sup>f</sup>Surface and diving heart rate.

(Castellini, 1995, 1996). Despite their different developmental strategies, elephant, Weddell and harbour seal pups appear to be capable divers, physiologically, by the time they must begin to forage independently (Castellini et al., 1994b; Burns et al., 1996; Castellini, 1996; Falabella et al., 1999). Species that begin to forage independently prior to 1 month of age, such as the bearded seal (Gjertz et al., 2000), may show even more rapid cardiorespiratory control development.

Unfortunately, harbour seal pups could not be studied while resting in their natural habitat. Unlike other phocids that haul-out on land or ice for extended periods of time and can be approached relatively easily while sleeping (Castellini, 1991; Blackwell and Le Boeuf, 1993; Castellini et al., 1994b; Falabella et al., 1999), harbour seals haul-out on coastal reefs or isolated rocks that flood with the rising tides (Lesage et al., 1995). They are very vigilant and wary (Venables and Venables, 1955; Terhune and Brilliant, 1996), fleeing to the water immediately upon approach (J.L.L., personal observation; Terhune and Almon, 1983; Henry and Hammill, 2001). In addition, harbour seal pups are extremely agile and capable of coordinated movement from a very young age (Dubé et al., 2003); therefore, restraint was necessary during our observations. However, we are confident that the effects of our experimental protocol were minimal, as many of the physiological measurements made in this study were quantitatively similar to those obtained by Greaves et al. (in press a) from free-ranging, diving harbour seal pups.

From electrophysiological studies on a variety of captive phocid species, it is apparent that prolonged terrestrial apnoeas are associated with sleep, and that profound cardiovascular and respiratory adjustments occur during the sleep cycle (Ridgway et al., 1975; Huntley, 1984; Castellini et al., 1994a; Skinner and Milsom, 2001). Lyamin et al. (1993) studied sleep in harp seal pups and found that there are developmental changes in sleep parameters. Therefore, in addition to the changes in cardiorespiratory patterns observed in harbour seal pups throughout this study, it is likely that sleep ontogenesis was also occurring during this time. Future studies incorporating both sleep state and apnoea physiology during this critical period of development would be of great interest, as Castellini (1996) has suggested.

In conclusion, developmental changes in the cardiorespiratory patterns associated with terrestrial apnoeas in harbour seal pups were comparable to those reported for elephant and Weddell seals (Castellini et al., 1994b; Castellini, 1996; Falabella et al., 1999). However, due to the early onset of independent foraging, maturation of cardiorespiratory control mechanisms occurred more rapidly in harbour seals. This parallels the development of diving activity (Greaves et al., in press a) and total body oxygen stores (Burns et al., 1999; Clark, 2004), which together enable harbour seal pups to be proficient divers and successful foragers upon weaning.

We thank P. Carter, C. Clark, D. Dion, Y. Dubé, J.-F. Gosselin, D. Greaves, J. Greig, J. Hicks, G. Jean, J. Keays, A. Ross, S. Turgeon, G. Yunker and numerous others for field

and laboratory assistance. We also thank P. Carter and R. Frank for help with the design and construction of the restraint mechanism; C. Campbell and J. Cooper for MatLab®, MathCad®, and SAS® programming assistance; E. Harvey, J. Hicks, and J. O'Hara Hines for statistical advice; J. Hicks, J. Greig, L. Boehmer and two anonymous reviewers for comments on previous versions of this manuscript. This project was funded in part by the Natural Sciences and Engineering Research Council of Canada (grant to J.F.S.), the Department of Fisheries and Oceans, Canada, and the University of Waterloo. All procedures were conducted in accordance with the guidelines set out by the Canadian Council on Animal Care and the University of Waterloo.

## References

- Andrews, R. D., Jones, D. R., Williams, J. D., Thorson, P. H., Oliver, G. W., Costa, D. P. and Le Boeuf, B. J. (1997). Heart rates of northern elephant seals diving at sea and resting on the beach. *J. Exp. Biol.* **200**, 2083-2095.
- Ashwell-Erickson, S. and Elsner, R. (1981). The energy cost of free existence for Bearing Sea harbor and spotted seals. In *The Eastern Bearing Sea Shelf: Oceanography and Resources*, vol. 2. (ed. D. W. Hood and J. A. Calder), pp. 869-899. Seattle: University of Washington Press.
- Bacon, J. P., Mackay, R. S., Cohn, H. E. and Lee, A. F. S. (1985). Development of a bimodal heart rate pattern in undisturbed fetal harbor seals. *Mar. Mamm. Sci.* **1**, 294-303.
- Bartholomew, G. A. (1954). Body temperature and respiratory and heart rates in the northern elephant seal. *J. Mammal.* **35**, 211-218.
- Bekkby, T. and Bjørge, A. (2000). Diving behaviour of harbour seal *Phoca vitulina* pups from nursing to independent feeding. *J. Sea Res.* **44**, 267-275.
- Blackwell, S. B. (1996). Terrestrial apnea in northern elephant seals, *Mirounga angustirostris*: Development and role in water economy. PhD thesis, University of California, Santa Cruz, USA. 132pp.
- Blackwell, S. B. and Le Boeuf, B. J. (1993). Developmental aspects of sleep apnoea in northern elephant seals, *Mirounga angustirostris*. *J. Zool.* **231**, 437-447.
- Bowen, W. D., Oftedal, O. T. and Boness, D. J. (1985). Birth to weaning in 4 days: Remarkable growth in the hooded seal, *Cystophora cristata*. *Can. J. Zool.* **63**, 2841-2846.
- Brody, S. (1945). *Bioenergetics and Growth*. New York: Reinhold Publishing. 1023pp.
- Burns, J. M. (1997). The development of diving behavior and physiology in juvenile Weddell seals (*Leptonychotes weddellii*) in McMurdo Sound, Antarctica. PhD thesis, University of Alaska, Fairbanks, USA. 177pp.
- Burns, J. M. and Castellini, M. A. (1996). Physiological and behavioral determinants of the aerobic dive limit in Weddell seal (*Leptonychotes weddellii*) pups. *J. Comp. Physiol. B* **166**, 473-483.
- Burns, J. M., Castellini, M. A., Hastings, K. K. and Zenteno-Savin, T. (1996). Development in juvenile Weddell seals: Diving, physiology, nutritional status, and survivorship. *Antarct. J. US* **31**, 109-110.
- Burns, J. M., Costa, D. P., Harvey, J. T. and Frost, K. (1999). Physiological Development in Juvenile Harbor Seals. *13th Biennial Conference on the Biology of Marine Mammals*, Wailea, Hawaii, USA, pp. 26-27.
- Butler, P. J. and Jones, D. R. (1997). Physiology of diving in birds and mammals. *Physiol. Rev.* **77**, 837-899.
- Castellini, M. A. (1991). The biology of diving mammals: behavioral, physiological and biochemical limits. In *Advances in Comparative and Environmental Physiology*, vol. 8 (ed. R. Gilles), pp. 105-134. Berlin: Springer-Verlag.
- Castellini, M. A. (1994). Apnea tolerance in the elephant seal during sleeping and diving: Physiological mechanisms and correlations. In *Elephant Seals: Population Ecology, Behavior, and Physiology* (ed. B. J. Le Boeuf and R. M. Laws), pp. 343-353. Berkeley: University of California Press.
- Castellini, M. A. (1995). Development of cardio-respiratory control necessary for diving in seal pups. In *11th Biennial Conference on the Biology of Marine Mammals*, Orlando, Florida, USA, pp. 21.
- Castellini, M. A. (1996). Dreaming about diving: sleep apnea in seals. *News Physiol. Sci.* **11**, 208-214.

- Castellini, M. A. and Zenteno-Savin, T.** (1997). Heart rate scaling with body mass in pinnipeds. *Mar. Mamm. Sci.* **13**, 149-155.
- Castellini, M. A., Milsom, W. K., Berger, R. J., Costa, D. P., Jones, D. R., Castellini, J. M., Rea, L. D., Bharma, S. and Harris, M.** (1994a). Patterns of respiration and heart rate during wakefulness and sleep in elephant seal pups. *Am. J. Physiol.* **266**, R863-R869.
- Castellini, M. A., Rea, L. D., Sanders, J. L., Castellini, J. M. and Zenteno-Savin, T.** (1994b). Developmental changes in cardiorespiratory patterns of sleep-associated apnea in northern elephant seals. *Am. J. Physiol.* **267**, R1294-R1301.
- Cherepanova, V., Neshumova, T. and Elsner, R.** (1993). Muscle blood flow in diving mammals. *Comp. Biochem. Physiol. A* **106**, 1-6.
- Clark, C. A.** (2004). Tracking changes: postnatal blood and muscle oxygen store development in harbor seals (*Phoca vitulina*). MSc thesis. University of Alaska, Anchorage, USA. 82 pp.
- Costa, D. P. and Ortiz, C. L.** (1980). Water, electrolyte and nitrogen balance in fasting weaned elephant seal pups, *Mirounga angustirostris*. *Physiol.* **23**, 98.
- Dubé, Y., Hammill, M. O. and Barrette, C.** (2003). Pup development and timing of pupping in harbour seals (*Phoca vitulina*) in the St. Lawrence River estuary, Canada. *Can. J. Zool.* **81**, 188-194.
- Dykes, R. W.** (1974). Factors related to the dive reflex in harbor seals: respiration, immersion bradycardia, and lability of the heart rate. *Can. J. Physiol. Pharmacol.* **52**, 248-258.
- Falabella, V., Lewis, M. and Campagna, C.** (1999). Development of cardiorespiratory patterns associated with terrestrial apneas in free-ranging southern elephant seals. *Physiol. Biochem. Zool.* **72**, 64-70.
- Gjertz, I., Kovacs, K. M., Lydersen, C. and Wiig, Ø.** (2000). Movements and diving of bearded seal (*Erignathus barbatus*) mothers and pups during lactation and post-weaning. *Polar Biol.* **23**, 559-566.
- Greaves, D. K., Schreer, J. F., Hammill, M. O. and Burns, J. M.** (in press a). Do seals have a two speed heart? Evidence from diving heart rate development in postnatal harbour seals. *Physiol. Biochem. Zool.*
- Greaves, D. K., Hughson, R. L., Topor, T., Schreer, J. F., Burns, J. M. and Hammill, M. O.** (in press b). Changes in heart rate variability during diving in young harbour seals, *Phoca vitulina*. *Mar. Mamm. Sci.*
- Hansen, S.** (1995). Temperature effects on metabolic rate, and the thermal limits of harbour (*Phoca vitulina*) and grey seals (*Halichoerus grypus*). Ph. D. Thesis. University of Guelph, Ontario, Canada. 298pp.
- Hansen, S. and Lavigne, D. M.** (1997). Ontogeny of the thermal limits in the harbor seal (*Phoca vitulina*). *Physiol. Zool.* **70**, 85-92.
- Harrison, R. J. and Tomlinson, J. D. W.** (1960). Normal and experimental diving in the common seal (*Phoca vitulina*). *Mammalia* **24**, 386-399.
- Henry, E. and Hammill, M. O.** (2001). Impact of small boats on the haulout activity of harbour seals (*Phoca vitulina*) in Métis Bay, Saint Lawrence Estuary, Québec, Canada. *Aquat. Mamm.* **27**, 140-148.
- Hindell, M. A. and M. A. Lea.** (1998). Heart rate, swimming speed, and estimated oxygen consumption of a free-ranging southern elephant seal. *Physiol. Zool.* **71**, 74-84.
- Huntley, A. C.** (1984). Relationships between metabolism, respiration, heart rate and arousal states in the northern elephant seal. PhD Thesis, University of California, Santa Cruz, USA. 89pp.
- Irving, L., Solandt, O. M., Solandt, D. Y. and Fisher, K. C.** (1935). The respiratory metabolism of the seal and its adjustment to diving. *J. Cell. Comp. Physiol.* **7**, 137-151.
- Jobsis, P. D., Ponganis, P. J. and Kooyman, G. L.** (2001). Effects of training on forced submersion responses in harbor seals. *J. Exp. Biol.* **204**, 3877-3885.
- Jones, D. R., Fisher, D., McTaggart, S. and West, N. H.** (1973). Heart rate during breath-holding and diving in the unrestrained harbour seal (*Phoca vitulina richardi*). *Can. J. Zool.* **51**, 671-680.
- Jørgensen, C., Lydersen, C., Brix, O. and Kovacs, K.** (2001). Diving development in nursing harbour seal pups. *J. Exp. Biol.* **204**, 3993-4004.
- Katona, P. G., Frasz, A. and Egbert, J.** (1980). Maturation of cardiac control in full-term and preterm infants during sleep. *Hum. Dev.* **4**, 145-159.
- Kenny, R.** (1979). Breathing and heart rates of the southern elephant seal, *Mirounga leonina* (L.). *Pap. Proc. R. Soc. Tasmania* **113**, 21-27.
- Kleiber, M.** (1961). *The Fire of Life: An Introduction to Animal Energetics*. New York: John Wiley and Sons. 454pp.
- Kodama, A. M., Elsner, R. and Pase, N.** (1977). Effects of growth, diving history, and high altitude on blood oxygen capacities in harbor seals. *J. Appl. Physiol.* **42**, 852-858.
- Kohin, S., Williams, T. M., Ortiz, C. L.** (1999). Effects of hypoxia and hypercapnia on aerobic metabolic processes in northern elephant seals. *Resp. Physiol.* **117**, 59-72.
- Kooyman, G. L.** (1968). An analysis of some behavioral and physiological characteristics related to diving in the Weddell seal. *Ant. Res. Ser.* **11**, 227-261.
- Kooyman, G. L.** (1989). *Diverse Divers: Physiology and Behavior*. *Zoophysiology*, vol 23. Berlin: Springer-Verlag. 216pp.
- Kooyman, G. L. and Campbell, W. B.** (1972). Heart rates in freely diving Weddell seals, *Leptonychotes weddellii*. *Comp. Biochem. Physiol.* **43A**, 31-36.
- Lavigne, D. M., Innes, S., Worthy, G. A. J., Kovacs, K. M., Schmitz, O. I. and Hickie, J. P.** (1986). Metabolic rates of seals and whales. *Can. J. Zool.* **64**, 279-284.
- Lesage, V., Hammill, M. O. and Kovacs, K. M.** (1995). Harbour seal (*Phoca vitulina*) and grey seal (*Halichoerus grypus*) abundance in the St. Lawrence Estuary. *Can. Ms. Rep. Fish. Aquat. Sci.* **2307**, iii-19.
- Liggins, G. C., Qvist, J., Hochachka, P. W., Murphy, B. J., Creasy, R. K., Schneider, R. C., Snider, M. T. and Zapol, W. M.** (1980). Fetal cardiovascular and metabolic responses to simulated diving in the Weddell seal. *J. Appl. Physiol.* **49**, 424-430.
- Lyamin, O. I., Oleksenko, A. I. and Polyakova, I. G.** (1993). Sleep in the harp seal (*Pagophilus groenlandica*). Peculiarities of sleep in pups during the first month of their lives. *J. Sleep Res.* **2**, 163-169.
- Miller, K. and Irving, L.** (1975). Metabolism and temperature regulation in young harbor seals *Phoca vitulina richardi*. *Am. J. Physiol.* **229**, 506-511.
- Mukhametov, L. M., Supin, A. Y. and Polyakova, I. G.** (1982). Electroencephalographic investigation of sleep in Caspian seals. *Dokl. Biol. Sci.* **266**, 752-755.
- Muelbert, M. M. C., Bowen, W. D. and Iverson, S. J.** (2003). Weaning mass affects changes in body composition and food intake in harbour seal pups during the first month of independence. *Physiol. Biochem. Zool.* **76**, 418-427.
- Newby, T. C.** (1973). Observations on the breeding behavior of harbor seals in the state of Washington. *J. Mammal.* **54**, 540-543.
- Noren, S. R., Williams, T. M., Pabst, D. A., McLellan, W. A. and Dearolf, J. L.** (2001). The development of diving in marine endotherms: preparing the skeletal muscles of dolphins, penguins, and seals for activity during submergence. *J. Comp. Physiol. B* **171**, 127-134.
- Ortiz, C. L., Costa, D. P. and Le Boeuf, B. J.** (1978). Water and energy flux in elephant seal pups fasting under natural conditions. *Physiol. Zool.* **51**, 166-178.
- Päsche, A. and Krog, J.** (1980). Heart rate in resting seals on land and in water. *Comp. Biochem. Physiol.* **67A**, 77-83.
- Poczopko, P.** (1979). Metabolic rate and body size relationships in adult and growing homeotherms. *Acta. Theriol.* **24**, 125-136.
- Ponganis, P. J., Kooyman, G. L. and Castellini, M. A.** (1993). Determinants of the aerobic dive limit of Weddell seals: Analysis of diving metabolic rates, postdive end tidal  $P_{O_2}$ 's and blood and muscle oxygen stores. *Physiol. Zool.* **66**, 732-749.
- Rea, L. D. and Costa, D. P.** (1992). Changes in standard metabolism during long-term fasting in northern elephant seal pups (*Mirounga angustirostris*). *Physiol. Zool.* **65**, 97-111.
- Ridgway, S. H., Harrison, R. J. and Joyce, P. L.** (1975). Sleep and cardiac rhythm in the gray seal. *Science* **187**, 553-555.
- Skinner, L. A. and Milsom, W. K.** (2001). Breathing patterns in the harbour seal (*Phoca vitulina richardsii*): Effects of state of arousal and level of respiratory drive. In *14<sup>th</sup> Biennial Conference on the Biology of Marine Mammals*. Vancouver, British Columbia, Canada. pp.198.
- Stahl, W. R.** (1967). Scaling of respiratory variables in mammals. *J. Appl. Physiol.* **22**, 453-460.
- Terhune, J. M. and Almon, M.** (1983). Variability of harbour seal numbers on haul-out sites. *Aquat. Mamm.* **10**, 71-78.
- Terhune, J. M. and Brillant, S. W.** (1996). Harbour seal vigilance decreases over time since haul out. *Anim. Behav.* **51**, 757-763.
- Thorson, P. H. and Le Boeuf, B. J.** (1994). Developmental aspects of diving in northern elephant seal pups. In *Elephant Seals: Population Ecology, Behavior, and Physiology* (ed. B. J. Le Boeuf and R. M. Laws), pp. 271-289. Berkeley: University of California Press.
- Venables, U. M. and Venables, L. S. V.** (1955). Observations on a breeding colony of the seal *Phoca vitulina* in Shetland. *J. Zool. Lond.* **125**, 521-532.
- Williams, R. and Bryden, M. M.** (1993). Observations of blood values, heart rate and respiratory rate of leopard seals (*Hydrurga leptonyx*) (Carnivora: Phocidae). *Aust. J. Zool.* **41**, 433-439.
- Zenteno-Savin, T. and Castellini, M. A.** (1998). Changes in plasma levels of vasoactive hormones during apnoea in seals. *Comp. Biochem. Physiol.* **119C**, 7-12.
